# Supplementary material
Source: Springer Nature journal article supplement (http://www.springermedizin.de/resource/supplementary/13014_2009_219_MOESM2_ESM.pdf/9633202)

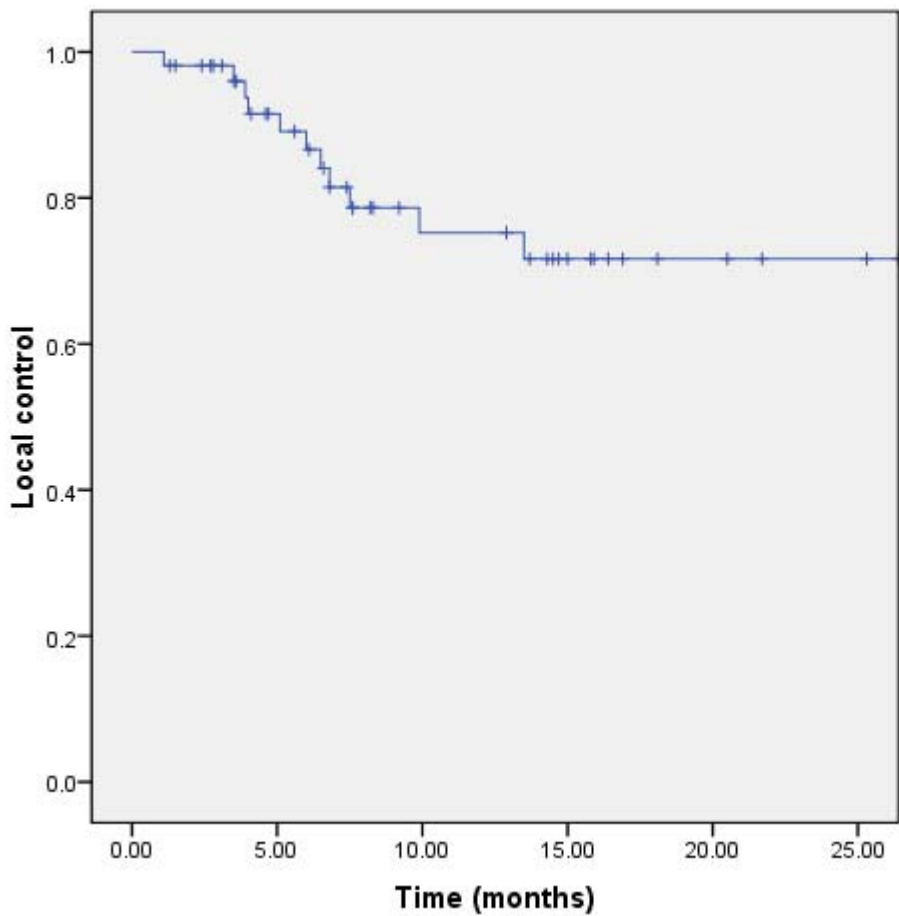

Supplement: MOESM2 [file 9633202]
